## **The Olivary Pretectal Nucleus Receives Visual Input of High Spatial Resolution**

Jared N. Levine<sup>1</sup> and Gregory W. Schwartz<sup>1,2</sup>

1. Departments of Ophthalmology and Physiology  
Feinberg School of Medicine, Northwestern University, Chicago, IL, 60611

2. Department of Neurobiology, Weinberg College of Arts and Sciences  
Northwestern University, Evanston IL, 60201

Jared N. Levine email address: [jared-levine@northwestern.edu](mailto:jared-levine@northwestern.edu)

Gregory W. Schwartz email address: [greg.schwartz@northwestern.edu](mailto:greg.schwartz@northwestern.edu)

Number of pages: 14

Number of figures: 4

Number of words in Abstract: 178

Number of words Introduction: 451

Number of words in Discussion: 601

The authors declare no conflict of interest.

Abbreviated title: Retinal input to the OPN

We acknowledge Tiffany Schmidt, J.C. Cang, and Yongling Zhu for their helpful comments on an earlier version of this manuscript.

## 1 **Abstract**

2 In the mouse, retinal output is computed by over 40 distinct types of retinal ganglion cells  
3 (RGCs) (Baden et al., 2016). Determining which of these many RGC types project to a  
4 retinorecipient region is a key step in elucidating the role that region plays in visually-mediated  
5 behaviors. Combining retrograde viral tracing and single-cell electrophysiology, we identify the  
6 RGC types which project to the olivary pretectal nucleus (OPN), a major visual structure. We  
7 find that retinal input to the OPN consists of a variety of intrinsically-photosensitive and  
8 conventional RGC types, the latter a diverse set of mostly ON RGCs. Surprisingly, while the  
9 OPN is most associated with the pupillary light reflex (PLR) pathway, requiring information  
10 about absolute luminance, we show that the majority of the retinal input to the OPN is from  
11 single cell type which transmits information unrelated to luminance. This ON-transient RGC  
12 accounts for two-thirds of the input to the OPN, and responds to small objects across a wide  
13 range of speeds. This finding suggests a role for the OPN in visually-mediated behaviors  
14 beyond the PLR.

## 15 **Significance statement**

16 The olivary pretectal nucleus is a midbrain structure which receives direct input from retinal  
17 ganglion cells (RGC), and modulates pupil diameter in response to changing absolute light  
18 level. In the present study, we combine viral tracing and electrophysiology to identify the RGC  
19 types which project to the OPN. Surprisingly, the majority of its input comes from a single type  
20 which does not encode absolute luminance, but instead responds to small objects across a wide  
21 range of speeds. These findings are consistent with a role for the OPN apart from pupil control  
22 and suggest future experiments to elucidate its full role in visually-mediated behavior.

## 23 **Introduction**

24 The olivary pretectal nucleus (OPN), one of several retinorecipient nuclei of the pretectum, has  
25 been studied for decades as a key structure in the pupillary light reflex (PLR) pathway, given its  
26 ability to encode luminance information (Trejo and Cicerone, 1984; Clarke and Ikeda, 1985) and  
27 its connectivity with the downstream effectors of the pupil reflex (Klooster *et al.*, 1995; (Klooster  
28 et al., 1993). Previous findings have indicated that the retinal projection to the OPN is bilateral  
29 and substantial (Young and Lund, 1998; Morin and Studholme, 2014), but while some of the  
30 RGC types projecting to the OPN have been identified, there has been no comprehensive  
31 classification of OPN-projecting RGCs. Characterization of transgenic mouse lines has identified  
32 projections to OPN from subsets of RGCs, but these findings are complicated by the fact that  
33 multiple RGC types are labeled in these lines (Rouso et al., 2016; Martersteck et al., 2017). A  
34 number of studies have described a strong projection of intrinsically-photosensitive (ip) ganglion  
35 cells to the OPN, suggesting that this class of RGC forms the predominant portion of total retinal  
36 input to this structure (Hattar et al., 2006). More recent work has identified selective innervation  
37 of the OPN shell region by a subset of M1 ipRGCs as critical for a fully functional PLR (Chen,  
38 Badea and Hattar, 2011). However, this work also indicates a non-melanopsin-expressing set of  
39 RGCs projects to the OPN core. Furthermore, anatomical studies have described connectivity  
40 between the OPN and brain regions that are involved in vision but not part of the canonical PLR  
41 circuit, such as the superior colliculus, the nucleus of the optic tract, and the ventral lateral  
42 geniculate nucleus (Klooster *et al.*, 1995). Thus, the OPN – particularly its core region – may  
43 play a role in visual behavior beyond the PLR, and identifying the complement of RGCs  
44 projecting to this structure represents an important step in uncovering the multiplexed and  
45 parallel code from the retina to the brain.

46 We combined retrograde viral tracing with single-cell electrophysiology to identify the RGC  
47 types which project to the OPN. We found projections from a large variety of RGC types, both  
48 ipRGCs and conventional RGCs. The majority of input to the OPN was carried by a single RGC

49 type, and while it has been molecularly identified as an ipRGC called the M6 (Quattrochi et al.,  
50 2019), we found that it does not encode absolute luminance. Rather, it is a transient ON RGC  
51 that responds to small stimuli across a wide range of speeds. These results suggest a special  
52 role for M6 RGCs in transmitting information to OPN that could be used in the spatiotemporal  
53 processing of small moving objects, augmenting our understanding of the visual function of this  
54 brain region.

## 55 **Methods**

### 56 *Animals*

57 Wild-type mice of both sexes of age P60-90 were used for all experiments.

### 58 *Stereotactic virus injections*

59 Prior to surgery, anesthesia was induced with the inhalable anesthetic isoflurane (~3% diluted in  
60 oxygen). During the procedure, anesthesia was maintained with ~1.5% isoflurane. Meloxicam  
61 was administered subcutaneously to reduce pain and edema (1.5 mg/kg in 10% saline). A small  
62 circular craniotomy was centered over the OPN using the following coordinates to target the  
63 rostral aspect: -2.50mm anterior/posterior, 0.60 mm medial/lateral and -2.37 mm dorsal/ventral.  
64 Subsequently, AAV engineered for retrograde transport and carrying either tdTomato or green  
65 fluorescent protein (AddGene, AAVrg-CAG-tdTomato, AAVrg-CAG-GFP) in PBS was injected  
66 using a Nanoject II (Drummond) fitted with a glass pipette with an inner diameter of 10–20  $\mu\text{m}$ . 4  
67 pulses of 9.2 nL each (36 nL total volume), at 30 s intervals, were delivered. Following injection,  
68 mice were kept alive for 5-7 days to allow for sufficient fluorescent protein expression in retinal  
69 ganglion cell bodies. The injection site was confirmed in post hoc in brain slices according to  
70 anatomical landmarks, or with intravitreal injection of 2 $\mu\text{l}$  of the cholera toxin b subunit (Sigma-  
71 Aldrich) into the contralateral eye.

### 72 *Retinal dissection and preparation*

73 Wild-type mice of either sex were dark-adapted overnight. Dissection and excision of retinal  
74 tissue were performed under infrared illumination (900 nm) using night-vision goggles and night-  
75 vision dissecting scope monocular attachments. Research animals were sacrificed in  
76 accordance with all animal care standards provided by Northwestern University. The retina was  
77 placed onto a glass coverslip coated with poly-d-lysine, with the ganglion cell layer facing  
78 upward. The retina was superfused with carbogenated Ames solution warmed to 32°C (US  
79 Biological Life Sciences, A-1372-25).

### 80 *Immunohistochemistry and histology*

81 Retinas were fixed for 10 min in 4% paraformaldehyde (Electron Microscopy Sciences) and  
82 incubated in 0.1 M phosphate buffer (PB) overnight at 4 °C. Fixed retinas containing cells filled  
83 with neurobiotin were then incubated in PBS containing 3% normal donkey serum (blocking  
84 agent), 0.05% sodium azide, 0.5% Triton X-100 overnight. This was followed by incubation in  
85 blocking solution and primary antibody against ChAT (Millipore, AB144P, goat anti-ChAT,  
86 1:500 v/v) for five nights at 4 °C. Afterward, tissues were rinsed in 0.1 M PB and incubated for  
87 two nights at 4 °C with a secondary antibody against goat IgG (Jackson ImmunoResearch, 711-  
88 605-152, donkey anti-goat Alexa 647, 1:500 v/v) and streptavidin (Thermo Scientific, DyLight  
89 488, 1:500 v/v). Following immunostaining, retinas were mounted on slides with Vectashield  
90 Antifade mounting (Vector Labs) medium. Following extraction, brains were fixed overnight in  
91 4% paraformaldehyde (Electron Microscopy Sciences). Fixed brains were then frozen in O.C.T.  
92 (Sakura, 4583) before sectioning. Frozen sections of 30  $\mu\text{m}$  were cut for identification of the  
93 injection site.

94 *Imaging*

95 Fixed tissues were imaged on a Nikon A1R laser scanning confocal microscope mounted on a  
96 Nikon Ti ZDrive PerfectFocus microscope stand equipped with an inverted  $\times 40$  oil immersion  
97 objective (Nikon Plan Apo VC  $\times 40/\times 60/1.4$  NA). RGC dendrites and ChAT labeling were imaged  
98 at 488 and 647 nm excitation, respectively. Dendritic arbors were traced using Fiji (ImageJ)  
99 software with the Simple Neurite Tracer plugin. Dendrites were traced and computationally  
100 flattened relative to the ChAT bands (Sümbül et al., 2014). Epifluorescence images of brain  
101 sections and retinas were acquired on a Nikon Ti2 widefield microscope.

102 *Visual stimuli*

103 Visual stimuli were presented with a custom-designed light-projection device capable of  
104 controlling patterned visual stimulation at high frame rates (1.4 kHz). Stimuli were generated on  
105 a  $912 \times 1140$ -pixel digital projector using the blue (450 nm) LED and focused on the  
106 photoreceptors. We report light intensities in rod isomerizations ( $R^*$ ) per rod per second. Based  
107 on the spectrum of our blue LED, the spectral sensitivities of mouse opsins, and collecting areas  
108 of mouse photoreceptors, each  $R^*$  corresponds to 0.3 isomerizations per M-cone opsin and  $6 \times$   
109  $10^{-4}$  isomerizations per S-cone opsin. Stimuli were first aligned to the RF center of each cell  
110 using a series of flashing horizontal and vertical bars from darkness ( $200 \times 40 \mu\text{m}$ ) across 13  
111 locations along each axis, spaced  $40 \mu\text{m}$  apart. Spots of diameters ranging from  $10\text{--}1200 \mu\text{m}$   
112 from darkness were used to characterize the spatial dynamics of RGC responses. For M6 RGC  
113 receptive field mapping, we used a spot of  $40 \mu\text{m}$  diameter flashed from darkness at different  
114 locations. Moving bars were presented from darkness at three orientations, and were  $1000 \mu\text{m}$   
115 long, and varied in width and drifting speed. Stimuli from darkness were presented at 200 rod  
116 isomerizations ( $R^*$ )/rod/s.

117 *Analysis*

118 Analysis of electrophysiology data was done with custom Matlab code  
119 (<https://github.com/SchwartzNU/SymphonyAnalysis>). Peak firing rates of M6 RGCs to the  
120 moving bar stimulus were calculated from peri-stimulus time histograms of spiking responses.  
121 For calculation of M6 receptive field diameter, first a spatial map of spike rate vs stimulus  
122 position was generated. Responses to individual spots were separated and peak values were  
123 averaged to generate a value for each position. These values were displayed on the grid  
124 locations to create a 2D RF strength map. A two-dimensional Gaussian fit was applied, the  
125 standard deviation in x and y were treated as the axes of an ellipse, and the area of the ellipse  
126 calculated as  $\pi \cdot a \cdot b$ . This area was then treated as circular, and the diameter calculated  
127 accordingly. For RGC soma counting to determine peak density of labeled RGCs, a square  $1$   
128  $\text{mm} \times 1 \text{mm}$  was drawn in the region of densest labeling, as determined by eye. The number of  
129 labeled cells was then determined using the ImageJ Objects Counter plugin.

130 *Statistical analysis*

131 Statistical analysis was performed using Igor Pro 8 (WaveMetrics) and MATLAB (MathWorks).  
132 Plots show means and SEM. Paired t-test was used to compare mean M6 responses to  
133 different light intensities (Figure 4).

134

135

136

137 **Results**

138 To identify the complement of RGC's which project to the OPN, we made use of a virus  
139 engineered for retrograde transport which carried either the red fluorophore tdTomato or the  
140 green fluorophore GFP (rAAV2-CAG-tdTomato or rAAV2-CAG-GFP). Virus was injected  
141 stereotactically into the OPN, anterior to the nucleus of the optic tract (NOT) and the posterior



142 pretectal nucleus (PPT), both nearby retinorecipient structures (Morin and Studholme, 2014). To  
143 verify the accuracy of the injection, we injected the retrograde tracer CTB into the eye  
144 contralateral to the brain injection site, thereby marking all retinorecipient brain regions with the  
145 far red dye Alexa647 (Figure 1A). The absence of CTB-labeled prepectal nuclei apart from the  
146 OPN near the brain injection site indicated that this structure was the only retinorecipient region  
147 in the area of the injection site (Figure 1A,B).

148 Injection of the OPN resulted in labeling of RGC somas and dendrites in the ventral-nasal  
149 portion of the contralateral retina, and sparse labeling in the ventral-temporal portion of the  
150 ipsilateral retina (Figure 1C), consistent with previous findings on the retinotopy of OPN (Scalia  
151 and Arango, 1979; Campbell and Lieberman, 1985; Young and Lund, 1998). We counted  
152 fluorescent somas within the densest 1 mm<sup>2</sup> of labeled retina to measure the density of RGCs  
153 innervating OPN (Figure 1D). The average density in the contralateral eye was  $107 \pm 9$   
154 cells/mm<sup>2</sup> (mean  $\pm$  SEM,  $n = 7$  retinas), and  $22 \pm 2$  cells/mm<sup>2</sup> in the ipsilateral eye ( $n = 4$   
155 retinas). These densities represent 3.25% and 0.66% of total RGC density, respectively (Jeon et  
156 al., 1998).

157

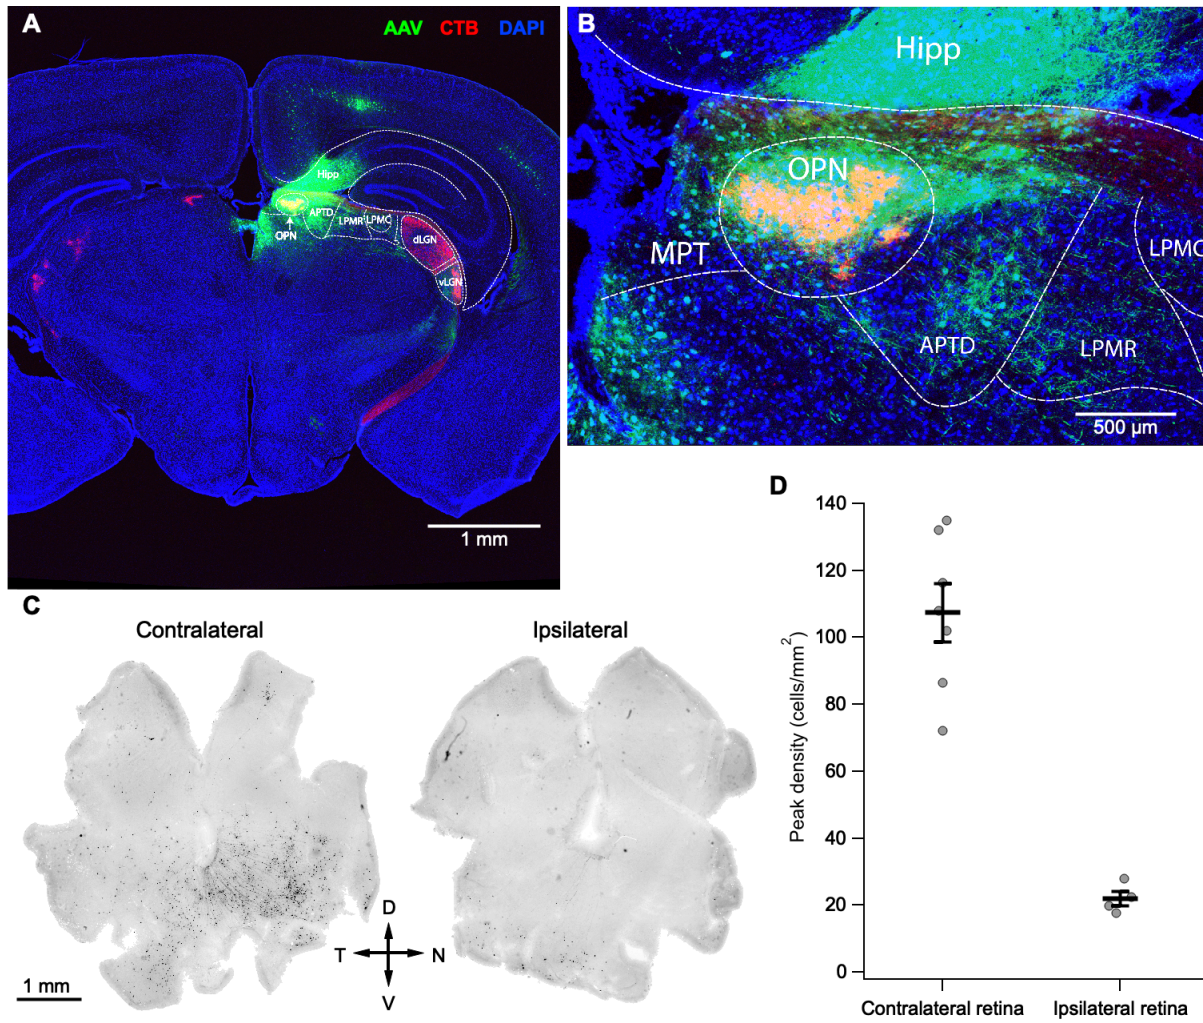

**Figure 1. Retrograde labeling of OPN-projecting RGCs.** **A**, Targeted injection of rostral aspect of OPN. Red: CTB-547 from contralateral intravitreal injection, demarcating retinorecipient regions. Green: AAVrg-CAG-GFP from injection, demarcating injection site. Green subcortical cell bodies away from injection site are from retrograde infection of the virus and indicate cells which project to OPN. Cortex and hippocampus along the injection tract are not retinorecipient (Morin and Studholme, 2014). Yellow: red from CTB-labeling of OPN, and green from virus injection, indicating target of the injection in the OPN. **B**, Higher magnification image of injection site in OPN. **C**, *Left*, Contralateral retina following 7 days of virus expression; *Right*, Ipsilateral retina. **D**, Peak density of labeled RGCs in contralateral and ipsilateral retina. Lines show mean and SEM of individual (grey) points from each retina. **Abbreviations:** APTD = anterior pretectal nucleus, dorsal aspect; dLGN = dorsal lateral geniculate nucleus; hipp = hippocampus; LPMC = lateral posterior thalamic nucleus, mediocaudal part; LPMR = lateral posterior thalamic nucleus, mediorostral part; MPT = medial pretectal nucleus; OPN = olivary pretectal nucleus; vLGN = ventral lateral geniculate nucleus (Paxinos and Franklin, 2012). D = dorsal; V = ventral; N = nasal; T = temporal.

158 To determine the identity of the labeled RGCs, we performed targeted *ex vivo*  
159 electrophysiological recordings guided by two-photon imaging in both contralateral and  
160 ipsilateral retina (n = 7 contralateral retinas; n = 4 ipsilateral retinas, Figure 2). Cells were  
161 characterized primarily on the basis of their responses to spots of light of varying diameter,  
162 intensity and duration centered on their receptive fields (n = 65 cells, contralateral and ipsilateral  
163 combined). In some cases, typology was confirmed on the basis of dendritic morphology and  
164 stratification in the inner plexiform layer (IPL). Finally, the labeling of some cells from viral  
165 infection was of sufficient brightness and completeness that these cells could be identified by  
166 imaging on the basis of their morphology and coarse stratification without electrophysiology (n =  
167 76 cells).

168 We found 14 types of RGCs that project to the OPN (Figure 2L). Intrinsically photosensitive  
169 retinal ganglion cells (ipRGCs) were the most abundant class of RGCs encountered, accounting  
170 for 82.9% (117/141) of all labeled RGCs. M1 ipRGCs have been shown previously to innervate  
171 the shell of the OPN, providing luminance information for the PLR (Chen et al., 2011).  
172 Consistent with these findings, we identified M1 ipRGCs (12/141), which responded to large  
173 spots of light with slow and sustained firing (Figure 2A), had a large, diffuse dendritic tree, and  
174 were stratified at the outer limit of the IPL (Figure 2B,C). We also identified a considerable  
175 proportion of M4 ipRGCs, also called ON-alpha RGCs, on the basis of their preference for spot  
176 sizes of large diameter, and their sustained firing and high spike rate, much higher than M1  
177 RGCs (n = 8/141, Figure 2D,E). Morphologically, they had comparatively dense dendritic trees  
178 with large caliber primary dendrites, and they stratified in the ON layer (Figure 2F,G). The  
179 remaining identified types with sparse projections to OPN included both previously described  
180 types, like ON-OFF DS RGCs, and two unpublished types (ON tr. MeRF and Motion sensor)  
181 named in our lab's large-scale classification project (Goetz et al., manuscript in preparation).  
182 The majority of these types were also ON RGCs, including ON direction-selective cells and F-  
183 mini-ON RGCs (7/9 non-ipRGC, Figure 2L).

184

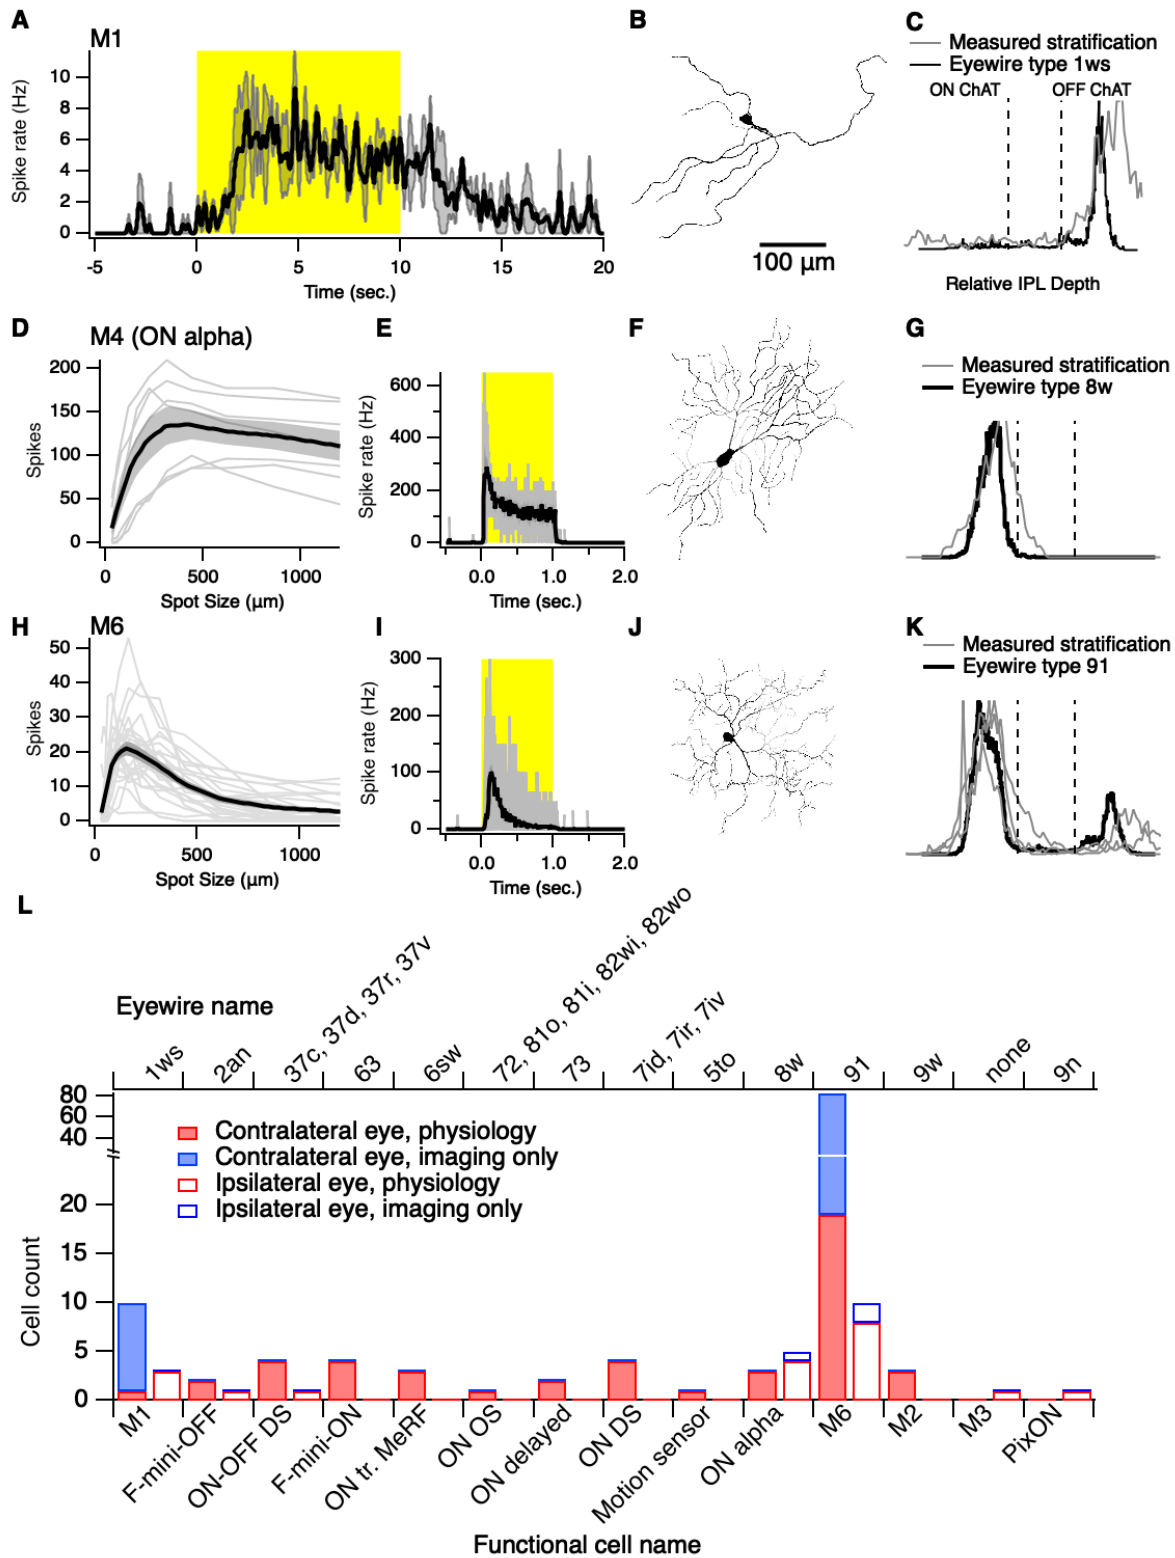

**Figure 2. Typology of OPN-projecting RGCs.** **A-C**, Physiology and morphology/stratification for M1 ipRGCs labeled by virus injection. **A**, Peri-stimulus time histogram of spiking response to presentation of full-field light step at 4744 r\* (n = 2 M1 ipRGCs). Histograms were smoothed with a sliding weighted average. **B**, Inverted confocal image of one M1 ipRGC. **C**, Stratification of M1 ipRGC. ON and OFF refer to the depth of the ON and OFF ChAT bands. Gray, trace stratification of M1. Black, average stratification of type '1ws', the putative M1 in the EyeWire data set, determined by electron microscopy (n = 2) (Bae et al., 2018). **D-G**, Physiology and morphology/stratification for ON alpha RGCs (M4 ipRGCs) labeled by virus injection. **D**, Spike count during stimulus presentation of spots of different diameters (average  $\pm$  SEM). **E**, Peri-stimulus time histogram at preferred spot size of 313  $\mu$ m. **F**, Inverted confocal image of one ON alpha RGC with physiology in D and E. **G**, Stratification as above. Gray, stratification of ON alpha RGC. Black, average of EyeWire type '8w' (n = 4). **H-K**, As in **D-G**, but for M6 ipRGCs. **H**, n = 27 M6 ipRGCs. **I**, Preferred spot size = 224  $\mu$ m, n = 27 M6 ipRGCs. **J**, Inverted confocal image of one M6 ipRGC with physiology in H and I. **K**, Gray, individual traces of M6 ipRGCs (n = 3). Black, average stratification of EyeWire type '91' RGCs (n = 7). **L**, Bar graph of all identified RGCs from all retinas, identified on the basis of physiology or coarse morphology/stratification from epifluorescence imaging (contralateral retina, solid bars, n = 46 RGCs physiology, 73 cells imaging; ipsilateral retina, empty bars, n = 18 cells physiology, 3 cells imaging). **Abbreviations:** ON tr. MeRF = ON transient, medium receptive field (unpublished); OS = ON orientation selective; DS = direction selective.

185 By far the RGC type most commonly encountered in both contralateral and ipsilateral retinas  
186 was the recently identified M6 ipRGC, which comprised 66% of all identified RGCs (n = 93/141  
187 cells, Figure 2L) (Quattrochi et al., 2019). Consistent with previous findings, M6 RGCs  
188 responded optimally to small spots of light and exhibited strong surround suppression to spot  
189 sizes beyond 200  $\mu$ m (n = 27 cells, Figure 2H). Additionally, their light responses were transient,  
190 ending by 0.5 sec into the 1 s stimulus presentation (n = 27, Figure 2I). They had small,  
191 moderately branched and spiny dendritic fields (Figure 2J), with bistratified, but primarily ON-  
192 stratified dendrites at the inner and outer margins of the IPL (n = 3 cells, Figure 2K), also  
193 consistent with the previous report (Quattrochi et al., 2019).

194 To estimate the proportion of the total retinal population of M6 RGCs labeled by our injections,  
195 we measured the density of labeled M6 somas in 1 mm<sup>2</sup> of retina to be 23.3 cells/mm<sup>2</sup>. We  
196 compared this value to the density of the morphological match to the M6 RGC in the Eyewire  
197 museum, type '91' (Bae et al., 2018), which also had a density of 23.3 cells/mm<sup>2</sup>. The close  
198 alignment of density values between the studies indicates that nearly all M6s were labeled by  
199 our injections, and thus, that the entire M6 population is likely to project to the OPN (Figure 3).

200



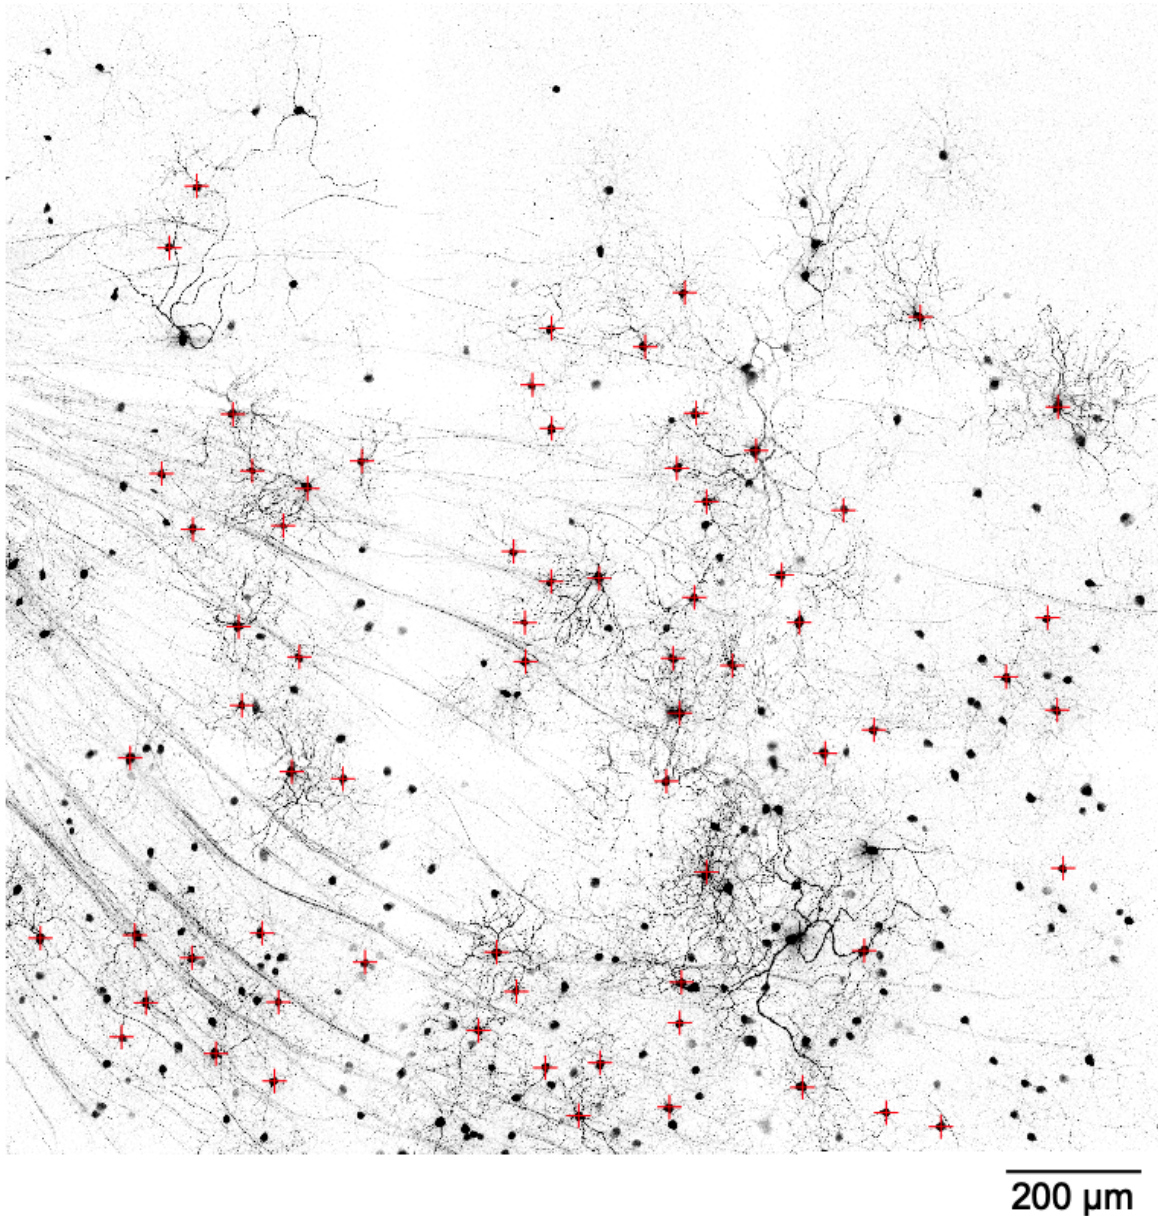

**Figure 3. A dense population of M6 RGCs projects to the OPN.** Image of the ventral-nasal region of a retina contralateral to the OPN injection. Red crosses indicate M6 RGCs confirmed by dendritic morphology in 3D.

201 Because M6 RGCs account for such a large proportion of the retinal input to OPN, we  
202 performed additional functional experiments to explore what type of information they might  
203 transmit. Receptive field measurements with individual spots of light revealed a small receptive  
204 field ( $95 \pm 13 \mu\text{m}^2$ ,  $n = 6$  M6 RGCs, Figure 4A,B). Given that retinal ganglion cells vary in the  
205 range of speeds of motion to which they respond (Jacoby and Schwartz, 2017), we probed the  
206 speed sensitivity of M6 RGCs by recording their spike responses to moving bars of different  
207 speeds and widths. The peak firing rate was similar across all speeds tested, from 1 to 8  
208 mm/sec and across widths from 50 to 200  $\mu\text{m}$  ( $n = 3$  M6 RGCs, Figure 4C).

209 Finally, given its classification as an ipRGC, we tested the ability of the M6 to encode absolute  
210 luminance by recording its spiking response to 60 s long, full-field steps of light of increasing

211 intensity (Figure 4D). While previous work in synaptic blockers revealed a modest, melanopsin-  
212 driven current in the M6 in response to full-field light steps, because we were interested in the  
213 spiking information regarding absolute luminance the M6 might transmit to the OPN, these  
214 experiments were performed in the absence of synaptic blockers (Quattrochi et al., 2019). We  
215 found that this stimulus elicited only a weak spiking response even for a luminance of  $10^5$   
216  $R^*/rod/s$ , where most M1 ipRGCs show robust and sustained responses (Figure 4D, top traces)  
217 (Milner and Do, 2017; Lee et al., 2019). There was also no significant increase in spike rate  
218 across luminance in the M6 RGCs we measured ( $10^3$  vs.  $10^5 R^*/rod/s$ ,  $p = 0.24$ , Student's  
219 paired t-test Fig. 4D, bottom). Therefore, M6 RGCs are unlikely to transmit absolute luminance  
220 information to the OPN, and any melanopsin-mediated current is likely only to have a  
221 modulatory effect on M6 function as in ON alpha (M4) ipRGCs (Sonoda et al., 2018).

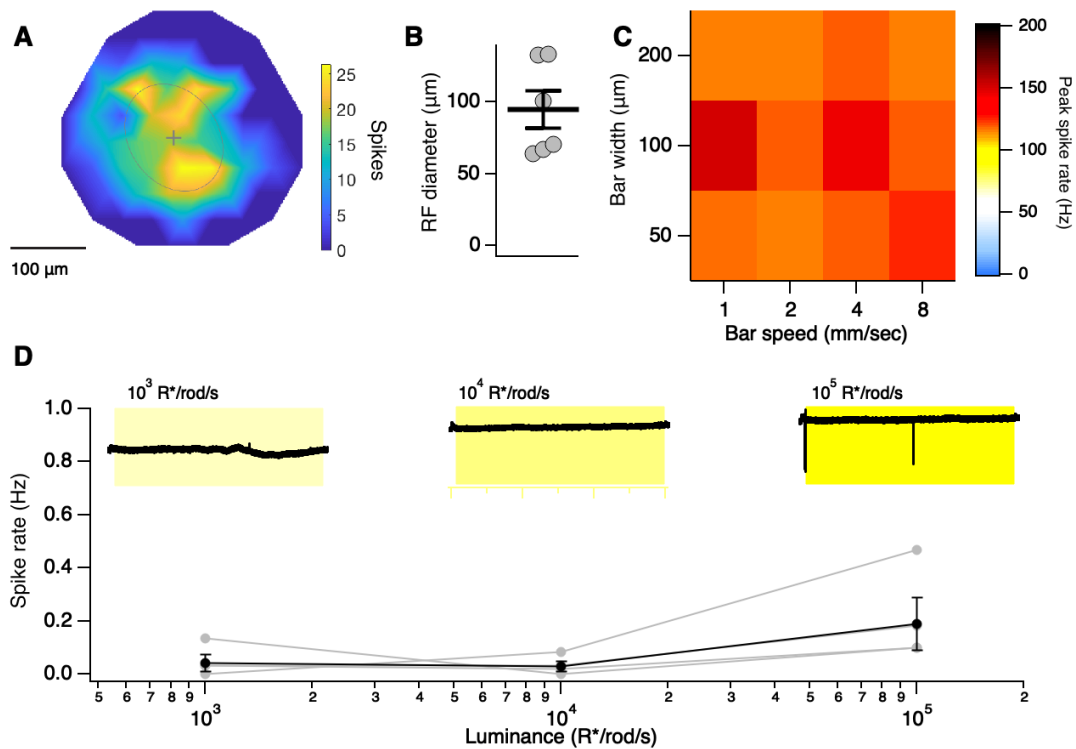

**Figure 4. M6 RGCs detect small objects across a range of speeds but do not encode absolute luminance.** **A**, Spiking receptive field of a representative M6 RGC. **B**, M6 RGC receptive field diameters. Lines indicate mean and SEM of individual cells (grey points). **C**, Peak spike rate of M6 RGCs to moving bars of various speeds and widths. Mean of 3 M6 RGCs. **D**, Mean spike rate of M6 RGCs over a 60 s light step. Data from individual cells (grey points) connected by lines. Black trace is the mean  $\pm$  SEM. Insets show cell-attached traces from an example cell where brief periods of spiking were observed only at  $10^5 R^*/rod/s$ . Yellow shading indicates the 60 s light stimulus. Recordings were all performed in the absence of synaptic blockers.

222

## 223 Discussion

224 Determining which of the more than 40 retinal ganglion cell types project to a given  
225 retinorecipient region is a vital step in elucidating how retinal output drives visually-guided  
226 behavior. We combined retrograde viral tracing with single-cell electrophysiology to identify the

227 RGC types which project to the OPN. We identified 14 types of RGCs projecting to the OPN,  
228 nearly all of which were ON RGCs. Despite this variety of inputs, the majority were from a single  
229 type of RGC, the M6 RGC (Quattrochi et al., 2019). We confirmed that the M6 RGC has a  
230 transient ON response to light onset and responds optimally to small spot sizes of about 200  $\mu\text{m}$   
231 with nearly complete surround suppression for larger spots. We also showed that the M6 RGC  
232 responds robustly to the presence of moving objects across a wide range of speeds. Despite  
233 the presence of melanopsin, the M6 RGC does not modulate its maintained spiking output with  
234 changes in luminance, suggesting that any melanopsin-mediated current is likely modulatory in  
235 its effect on M6 physiology.

236 Given our result that much of the input to OPN conveys information about high spatial resolution  
237 rather than luminance, it is fair to speculate that this nucleus serves a function in addition to its  
238 well-established role in the pupillary light reflex. Consistent with this idea is the substantial  
239 connectivity from the OPN to other visual structures, including the superior colliculus,  
240 suprachiasmatic nucleus, intergeniculate leaflet, the ventral lateral geniculate nucleus, and the  
241 lateral posterior-pulvinar complex of the thalamus (Klooster et al., 1995; Moga and Moore,  
242 1997). Interestingly, there is a retinal projection to the OPN in the blind mole rat in spite of the  
243 absence of an iris or ciliary body (Cooper et al., 1993). Other tracing studies have revealed that  
244 a subset of M1 ipRGCs connects with the shell of the OPN, and that the pupillary light reflex is  
245 severely attenuated when these cells are genetically ablated (Chen et al., 2011). Such work  
246 leaves open the possibility that other functions may be mediated by the core of the OPN, and  
247 projections to the aforementioned targets of OPN efferents.

248 Our findings suggest a number of experiments to illuminate M6 functionality and its role in  
249 visually-guided behavior mediated by the OPN. First, what is the function of melanopsin in the  
250 M6 if not to encode absolute luminance? Despite a small current, melanopsin activation leads to  
251 increased excitability in M4 (ON alpha) RGCs through a different transduction pathway than that  
252 in M1 RGCs (Sonoda et al., 2018). The nature of the melanopsin transduction pathway in M6  
253 RGCs and its relationship to function remain open questions. Second, recordings from neurons  
254 within the OPN have centered around luminance sensitivity, revealing the presence of cells  
255 which increase spiking monotonically with increasing luminance (Clarke and Ikeda, 1985).  
256 Single-cell recording and imaging studies of the OPN with the presentation of moving objects  
257 could reveal additional visual sensitivity. Additionally, genetic silencing of retinal input to OPN  
258 could reveal behavioral effects beyond disruption of the PLR, perhaps even in a task involving  
259 small moving objects, like prey-capture (Hoy et al., 2016). Finally, It should be noted that our  
260 findings on M6 physiology are not inconsistent with a role in the PLR. Previous work has shown  
261 that rod photoreception is vital for the fast component of pupil constriction (Keenan et al., 2016).  
262 Therefore, It is possible that the M6 contributes to the fast kinetics of the PLR during its  
263 transient response to light onset. If an appropriately specific M6-only mouse line is created,  
264 silencing M6 RGCs while testing the PLR would test whether they play a role in this reflex.

265

266

267 **References**

- 268 Baden T, Berens P, Franke K, Román Rosón M, Bethge M, Euler T (2016) The functional  
269 diversity of retinal ganglion cells in the mouse. *Nature* 529:345–350.
- 270 Bae JA, Mu S, Kim JS, Turner NL, Tartavull I, Kemnitz N, Jordan CS, Norton AD, Silversmith  
271 WM, Prentki R, Sorek M, David C, Jones DL, Bland D, Sterling ALR, Park J, Briggman KL,  
272 Seung HS, Eyewirers (2018) Digital Museum of Retinal Ganglion Cells with Dense  
273 Anatomy and Physiology. *Cell* 173:1293–1306.e19.
- 274 Campbell G, Lieberman AR (1985) The olivary pretectal nucleus: experimental anatomical  
275 studies in the rat. *Philos Trans R Soc Lond B Biol Sci* 310:573–609.
- 276 Chen S-K, Badea TC, Hattar S (2011) Photoentrainment and pupillary light reflex are mediated  
277 by distinct populations of ipRGCs. *Nature* 476:92–95.
- 278 Clarke RJ, Ikeda H (1985) Luminance and darkness detectors in the olivary and posterior  
279 pretectal nuclei and their relationship to the pupillary light reflex in the rat. I. Studies with  
280 steady luminance levels. *Exp Brain Res* 57:224–232.
- 281 Cooper HM, Herbin M, Nevo E (1993) Visual system of a naturally microphthalmic mammal: the  
282 blind mole rat, *Spalax ehrenbergi*. *J Comp Neurol* 328:313–350.
- 283 Hattar S, Kumar M, Park A, Tong P, Tung J, Yau K-W, Berson DM (2006) Central projections of  
284 melanopsin-expressing retinal ganglion cells in the mouse. *J Comp Neurol* 497:326–349.
- 285 Hoy JL, Yavorska I, Wehr M, Niell CM (2016) Vision Drives Accurate Approach Behavior during  
286 Prey Capture in Laboratory Mice. *Curr Biol* 26:3046–3052.
- 287 Jacoby J, Schwartz GW (2017) Three Small-Receptive-Field Ganglion Cells in the Mouse  
288 Retina Are Distinctly Tuned to Size, Speed, and Object Motion. *J Neurosci* 37:610–625.
- 289 Jeon C-J, Strettoi E, Masland RH (1998) The Major Cell Populations of the Mouse Retina. *The*  
290 *Journal of Neuroscience* 18:8936–8946 Available at: [http://dx.doi.org/10.1523/jneurosci.18-](http://dx.doi.org/10.1523/jneurosci.18-21-08936.1998)  
291 [21-08936.1998](http://dx.doi.org/10.1523/jneurosci.18-21-08936.1998).
- 292 Keenan WT, Rupp AC, Ross RA, Somasundaram P, Hiriyanna S, Wu Z, Badea TC, Robinson  
293 PR, Lowell BB, Hattar SS (2016) A visual circuit uses complementary mechanisms to  
294 support transient and sustained pupil constriction. *Elife* 5 Available at:  
295 <http://dx.doi.org/10.7554/eLife.15392>.
- 296 Klooster J, Beckers HJM, G F J, van der Want JJL (1993) The peripheral and central projections  
297 of the Edinger-Westphal nucleus in the rat. A light and electron microscopic tracing study.  
298 *Brain Research* 632:260–273 Available at: [http://dx.doi.org/10.1016/0006-8993\(93\)91161-k](http://dx.doi.org/10.1016/0006-8993(93)91161-k).
- 299 Klooster J, G F J, Müller LJ, van der Want JJL (1995) Efferent projections of the olivary pretectal  
300 nucleus in the albino rat subserving the pupillary light reflex and related reflexes a light  
301 microscopic tracing study. *Brain Research* 688:34–46 Available at:  
302 [http://dx.doi.org/10.1016/0006-8993\(95\)00497-e](http://dx.doi.org/10.1016/0006-8993(95)00497-e).
- 303 Lee SK, Sonoda T, Schmidt TM (2019) M1 Intrinsically Photosensitive Retinal Ganglion Cells  
304 Integrate Rod and Melanopsin Inputs to Signal in Low Light. *Cell Rep* 29:3349–3355.e2.



- 305 Martersteck EM, Hirokawa KE, Evarts M, Bernard A, Duan X, Li Y, Ng L, Oh SW, Ouellette B,  
306 Royall JJ, Stoecklin M, Wang Q, Zeng H, Sanes JR, Harris JA (2017) Diverse Central  
307 Projection Patterns of Retinal Ganglion Cells. *Cell Rep* 18:2058–2072.
- 308 Milner ES, Do MTH (2017) A Population Representation of Absolute Light Intensity in the  
309 Mammalian Retina. *Cell*:1–12.
- 310 Moga MM, Moore RY (1997) Organization of neural inputs to the suprachiasmatic nucleus in the  
311 rat. *J Comp Neurol* 389:508–534.
- 312 Morin LP, Studholme KM (2014) Retinofugal projections in the mouse. *J Comp Neurol*  
313 522:3733–3753.
- 314 Paxinos G, Franklin KBJ (2012) Paxinos and Franklin's the Mouse Brain in Stereotaxic  
315 Coordinates. Academic Press.
- 316 Quattrochi LE, Stabio ME, Kim I, Ilardi MC, Michelle Fogerson P, Leyrer ML, Berson DM (2019)  
317 The M6 cell: A small-field bistratified photosensitive retinal ganglion cell. *J Comp Neurol*  
318 527:297–311.
- 319 Rouso DL, Qiao M, Kagan RD, Yamagata M, Palmiter RD, Sanes JR (2016) Two Pairs of ON  
320 and OFF Retinal Ganglion Cells Are Defined by Intersectional Patterns of Transcription  
321 Factor Expression. *Cell Reports* 15:1930–1944 Available at:  
322 <http://dx.doi.org/10.1016/j.celrep.2016.04.069>.
- 323 Scalia F, Arango V (1979) Topographic organization of the projections of the retina to the  
324 pretectal region in the rat. *J Comp Neurol* 186:271–292.
- 325 Sonoda T, Lee SK, Birnbaumer L, Schmidt TM (2018) Melanopsin Phototransduction Is  
326 Repurposed by ipRGC Subtypes to Shape the Function of Distinct Visual Circuits. *Neuron*  
327 99:754–767.e4.
- 328 Sümbül U, Song S, McCulloch K, Becker M, Lin B, Sanes JR, Masland RH, Sebastian Seung H  
329 (2014) A genetic and computational approach to structurally classify neuronal types. *Nature*  
330 *Communications* 5 Available at: <http://dx.doi.org/10.1038/ncomms4512>.
- 331 Trejo LJ, Cicerone CM (1984) Cells in the pretectal olivary nucleus are in the pathway for the  
332 direct light reflex of the pupil in the rat. *Brain Res* 300:49–62.
- 333 Young MJ, Lund RD (1998) The retinal ganglion cells that drive the pupilloconstrictor response  
334 in rats. *Brain Res* 787:191–202.
- 335 Campbell, G., and A. R. Lieberman. 1985. "The Olivary Pretectal Nucleus: Experimental  
336 Anatomical Studies in the Rat." *Philosophical Transactions of the Royal Society of London.*  
337 *Series B, Biological Sciences* 310 (1147): 573–609.
- 338 Martersteck, Emily M., Karla E. Hirokawa, Mariah Evarts, Amy Bernard, Xin Duan, Yang Li,  
339 Lydia Ng, et al. 2017. "Diverse Central Projection Patterns of Retinal Ganglion Cells." *Cell*  
340 *Reports* 18 (8): 2058–72.
- 341 Morin, Lawrence P., and Keith M. Studholme. 2014. "Retinofugal Projections in the Mouse." *The*  
342 *Journal of Comparative Neurology* 522 (16): 3733–53.

- 343 Quattrochi, Lauren E., Maureen E. Stabio, Inkyu Kim, Marissa C. Ilardi, P. Michelle Fogerson,  
344 Megan L. Leyrer, and David M. Berson. 2019. "The M6 Cell: A Small-Field Bistratified  
345 Photosensitive Retinal Ganglion Cell." *The Journal of Comparative Neurology* 527 (1): 297–  
346 311.
- 347 Rousso, David L., Mu Qiao, Ruth D. Kagan, Masahito Yamagata, Richard D. Palmiter, and  
348 Joshua R. Sanes. 2016. "Two Pairs of ON and OFF Retinal Ganglion Cells Are Defined by  
349 Intersectional Patterns of Transcription Factor Expression." *Cell Reports*.  
350 <https://doi.org/10.1016/j.celrep.2016.04.069>.
- 351 Scalia, F., and V. Arango. 1979. "Topographic Organization of the Projections of the Retina to  
352 the Pretectal Region in the Rat." *The Journal of Comparative Neurology* 186 (2): 271–92.
- 353
